# Supplementary material
Source: Springer Nature journal article supplement (https://www.springermedizin.de/resource/supplementary/12985_2010_843_MOESM13_ESM.pdf/9609312)

8A

# Tropical Buildings

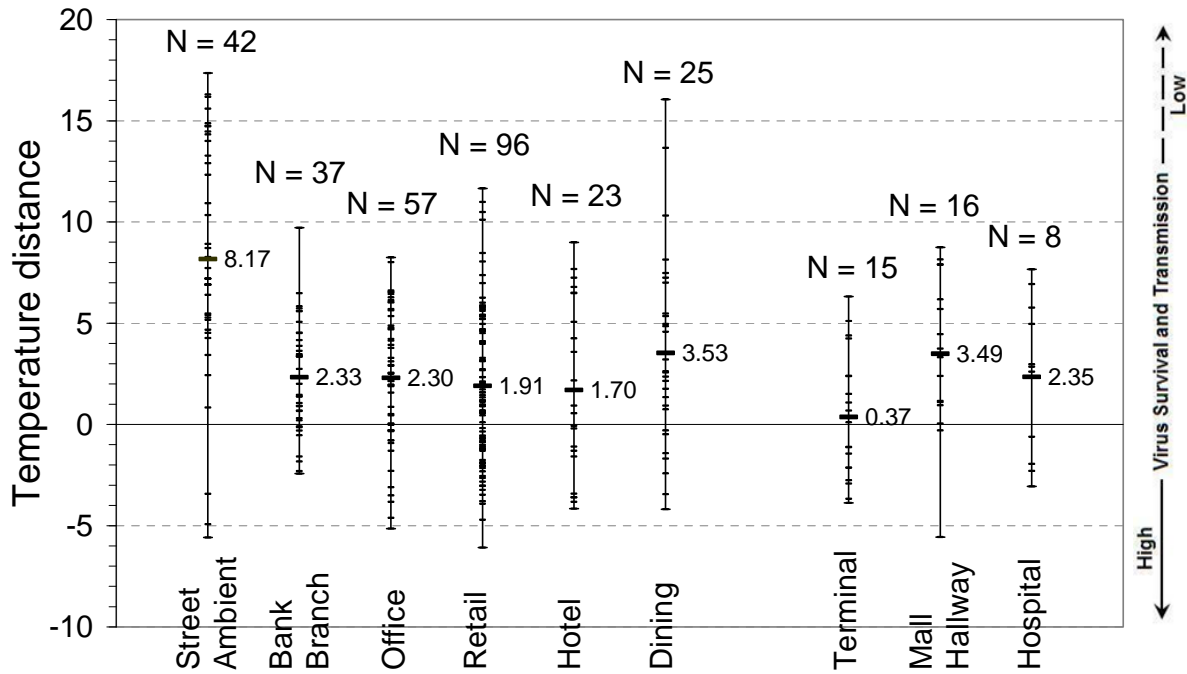

8B

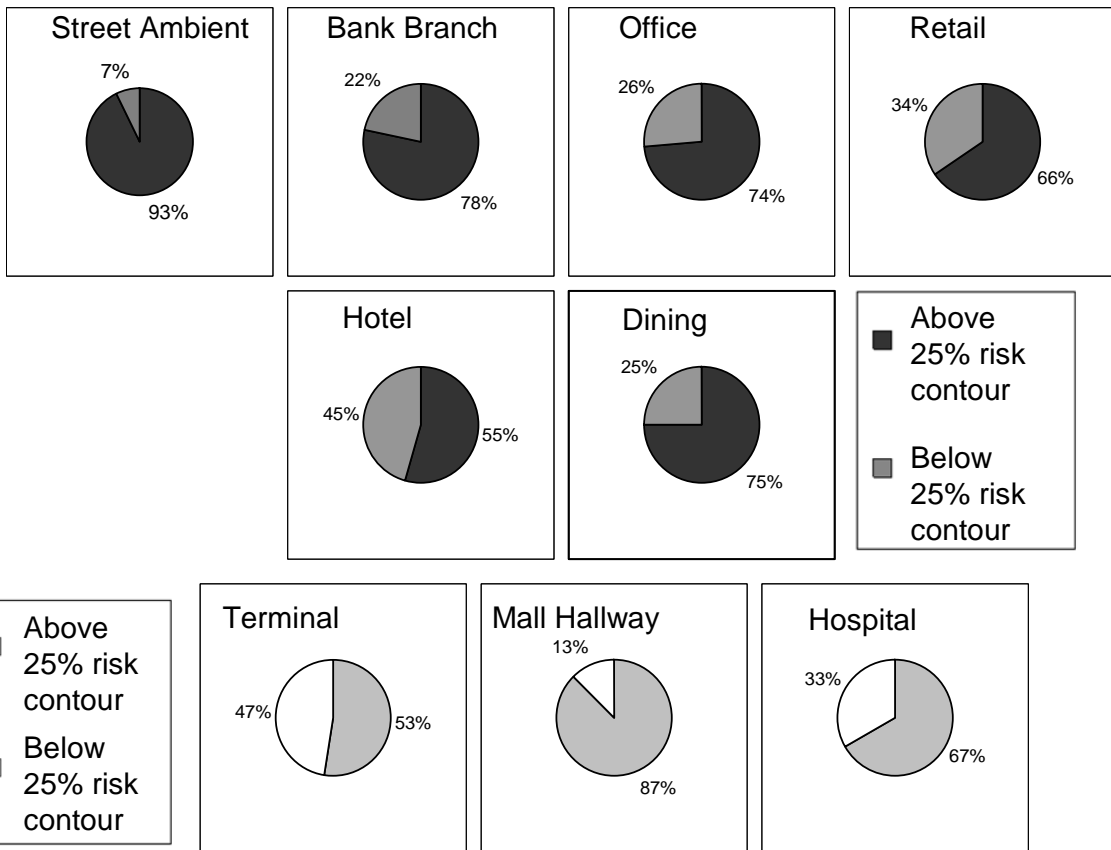

Supplement: MOESM13 [file 9609312]
